# Supplementary material for: The Effect of Probiotic Supplementation on Glucolipid Metabolism in Patients with Type 2 Diabetes: A Systematic Review and Meta-Analysis
Source: MDPI journal article supplement (doi:10.3390/nu15143240), 2023-07-21
Supplement: s1 [file s1]

## **Supplementary S1 Details of searching strategy and screening process**

### ***WOS***

Search strategy: (((((((("Diabetes Mellitus"[Mesh]) OR (diabetes[Title/Abstract])) OR (Diabetes Mellitus[Title/Abstract])) OR (diabete[Title/Abstract])) OR (diabetic[Title/Abstract])) OR (hyperglycemia[Title/Abstract])) OR (Glucose Intolerance[Title/Abstract])) AND (((("Probiotics"[Mesh]) OR (probiotics[Title/Abstract])) OR (probiotic[Title/Abstract])) OR (lactobacillus[Title/Abstract])) OR (bifidobacterial[Title/Abstract]))

Search results:4750

### ***PubMed***

Search strategy: (((((((("Diabetes Mellitus"[Mesh]) OR (diabetes[Title/Abstract])) OR (Diabetes Mellitus[Title/Abstract])) OR (diabete[Title/Abstract])) OR (diabetic[Title/Abstract])) OR (hyperglycemia[Title/Abstract])) OR (Glucose Intolerance[Title/Abstract])) AND (((("Probiotics"[Mesh]) OR (probiotics[Title/Abstract])) OR (probiotic[Title/Abstract])) OR (lactobacillus[Title/Abstract])) OR (bifidobacterial[Title/Abstract]))

Search results:2766

*Cochrane*

- #1 MeSH descriptor: [Diabetes Mellitus] explode all trees 35497
- #2 (Glucose Intolerance):ti,ab,kw OR (diabetes):ti,ab,kw OR (diabete):ti,ab,kw OR (diabetic):ti,ab,kw OR (hyperglycemia):ti,ab,kw 109291
- #3 #1 or #2 109492
- #4 MeSH descriptor: [Probiotics] explode all trees2563
- #5 (probiotics):ti,ab,kw OR (probiotic):ti,ab,kw OR (lactobacillus):ti,ab,kw OR (bifidobacterial):ti,ab,kw 10187
- #6 #4 or #5 10232
- #7 #3 and #6 655 (Trials 647)

*Embase*

| Embase Session Results |                                                                                                                                                                                                                                                         |           |
|------------------------|---------------------------------------------------------------------------------------------------------------------------------------------------------------------------------------------------------------------------------------------------------|-----------|
| No.                    | Query                                                                                                                                                                                                                                                   | Results   |
| #3                     | #1 AND #2                                                                                                                                                                                                                                               | 3,576     |
| #2                     | 'probiotics'/exp OR probiotics OR probiotics:ti,ab,kw OR probiotic:ti,ab,kw OR lactobacillus:ti,ab,kw OR bifidobacterial:ti,ab,kw                                                                                                                       | 84,882    |
| #1                     | 'diabetes mellitus'/exp OR 'diabetes mellitus' OR (('diabetes'/exp OR diabetes) AND mellitus) OR 'diabetes mellitus':ti,ab,kw OR diabetes:ti,ab,kw OR diabete:ti,ab,kw OR diabetic:ti,ab,kw OR hyperglycemia:ti,ab,kw OR 'glucose intolerance':ti,ab,kw | 1,390,312 |
