# Supplementary figures and images for: The Effect of Probiotic Supplementation on Glucolipid Metabolism in Patients with Type 2 Diabetes: A Systematic Review and Meta-Analysis
Source: MDPI journal article supplement (doi:10.3390/nu15143240), 2023-07-21

Funnel plot with pseudo 95% confidence limits

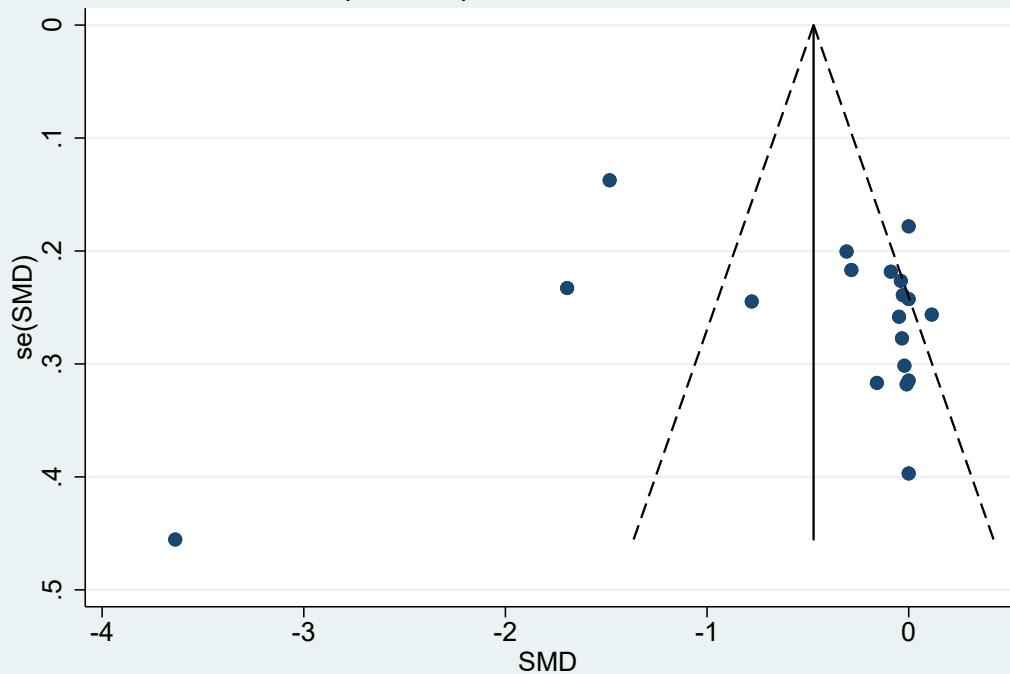

Supplement: s1 [file s1]

Funnel plot with pseudo 95% confidence limits

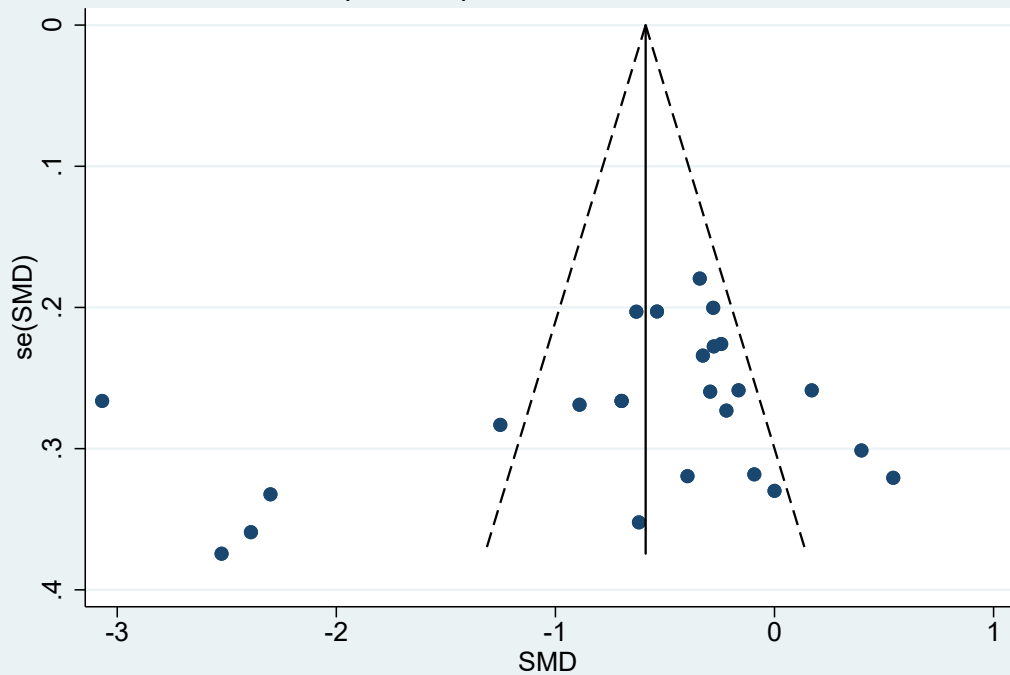

Supplement: s1 [file s1]

Funnel plot with pseudo 95% confidence limits

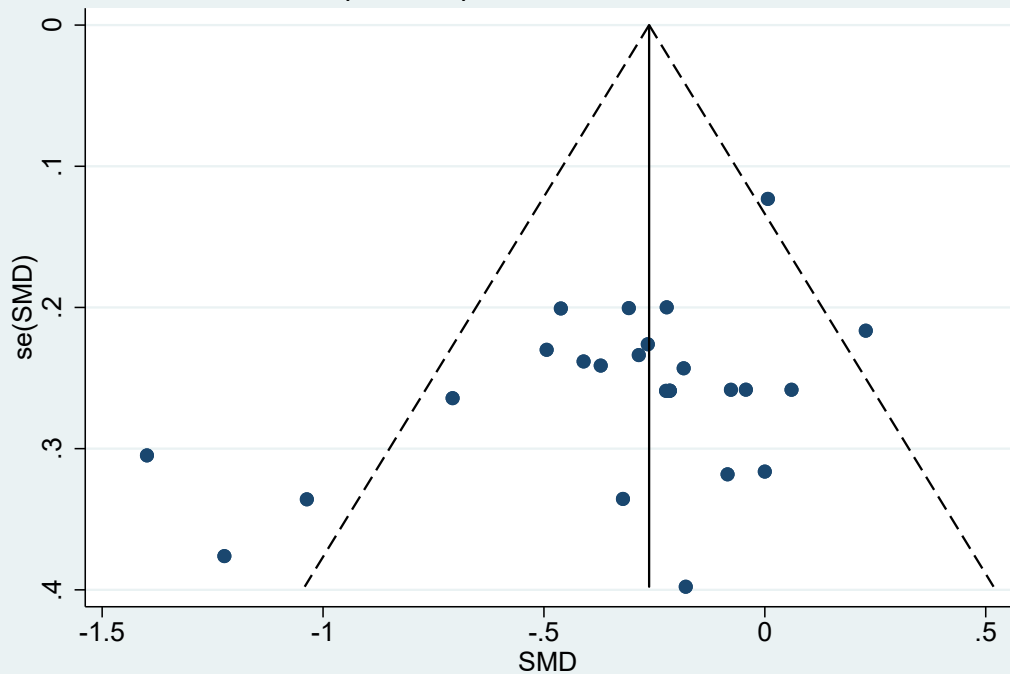

Supplement: s1 [file s1]

Funnel plot with pseudo 95% confidence limits

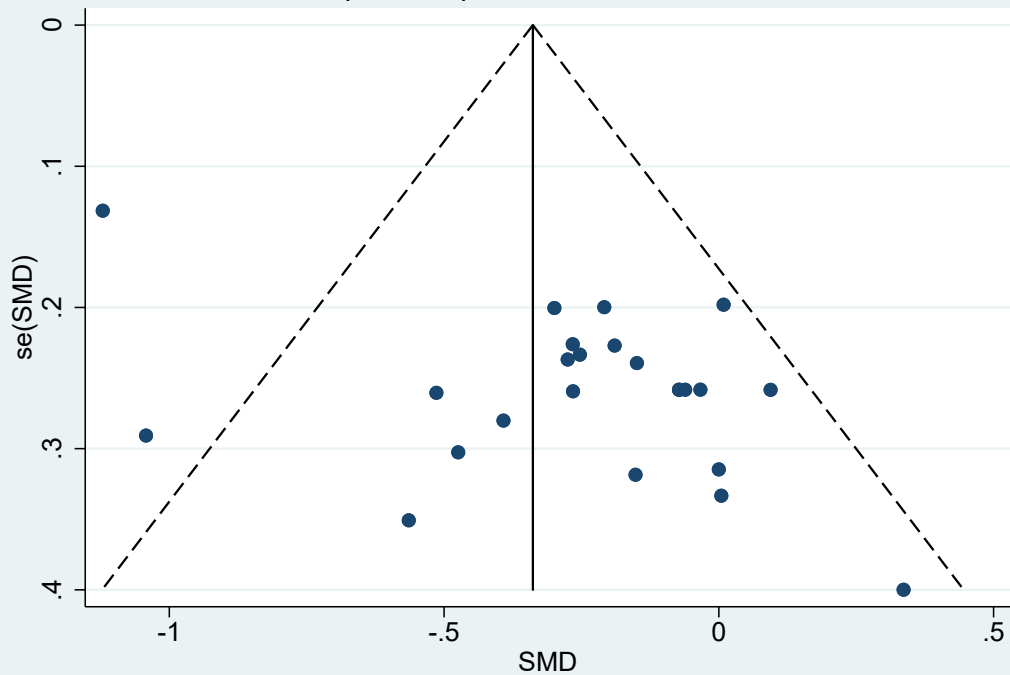

Supplement: s1 [file s1]

Funnel plot with pseudo 95% confidence limits

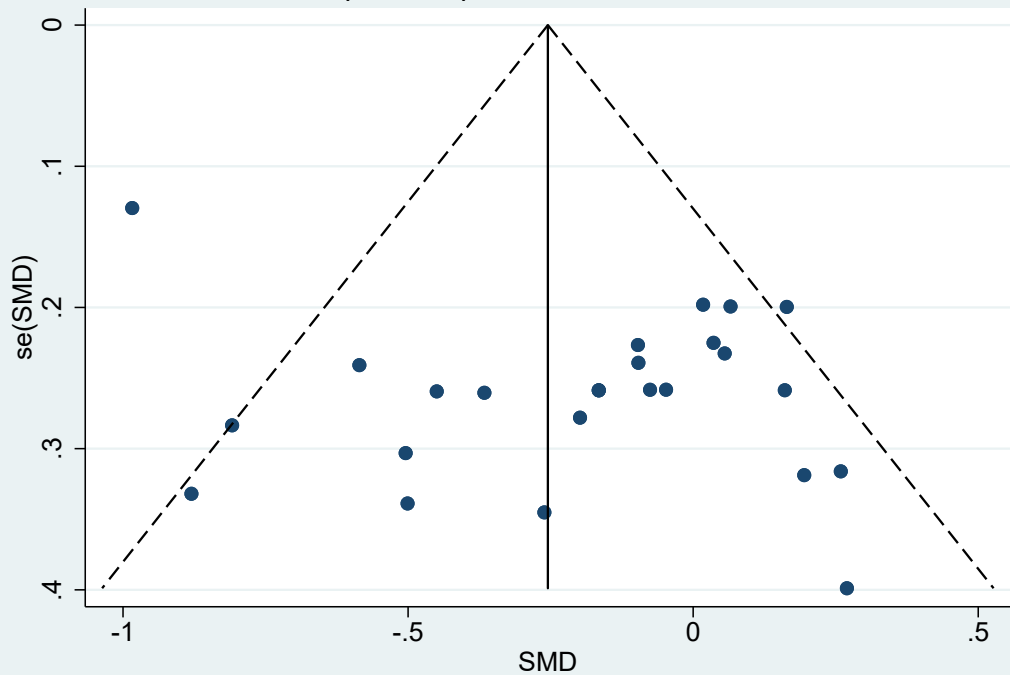

Supplement: s1 [file s1]

Funnel plot with pseudo 95% confidence limits

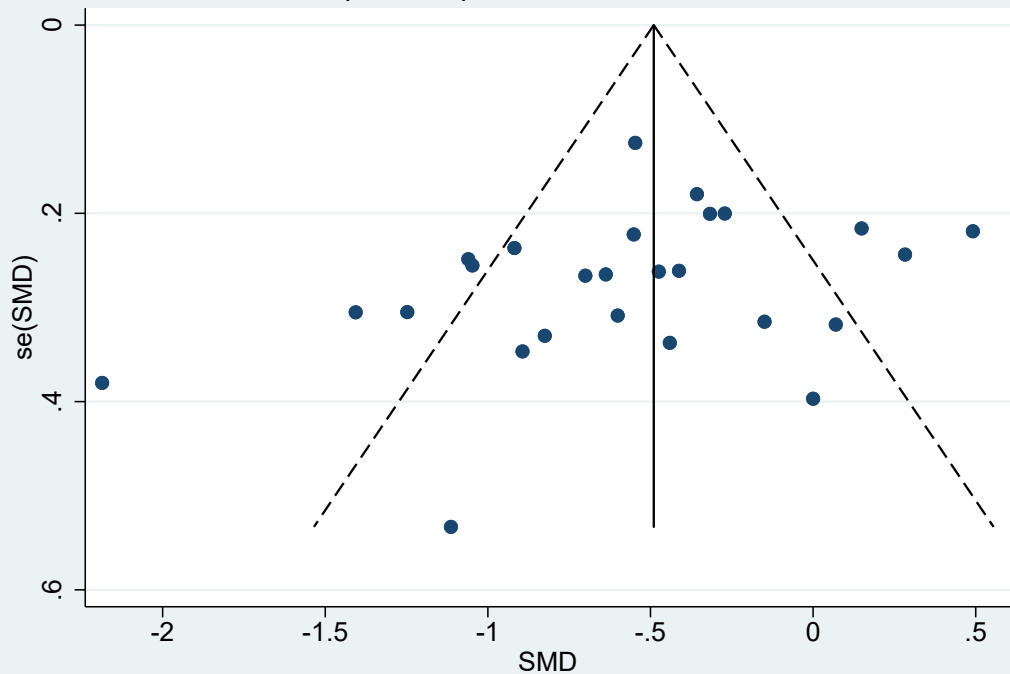

Supplement: s1 [file s1]

Funnel plot with pseudo 95% confidence limits

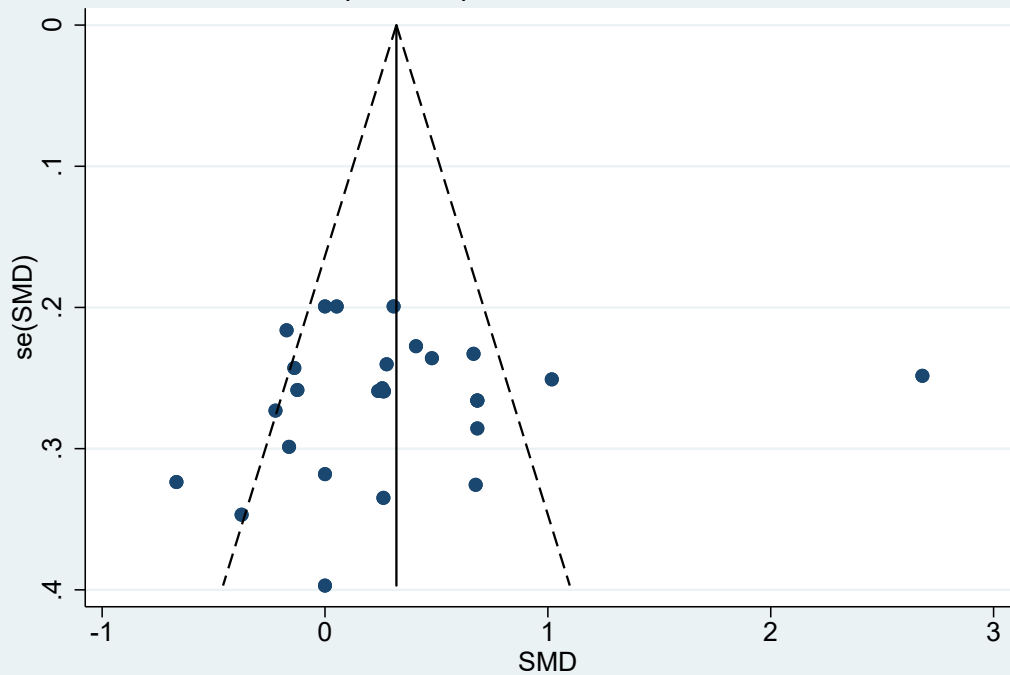

Supplement: s1 [file s1]

### Funnel plot with pseudo 95% confidence limits

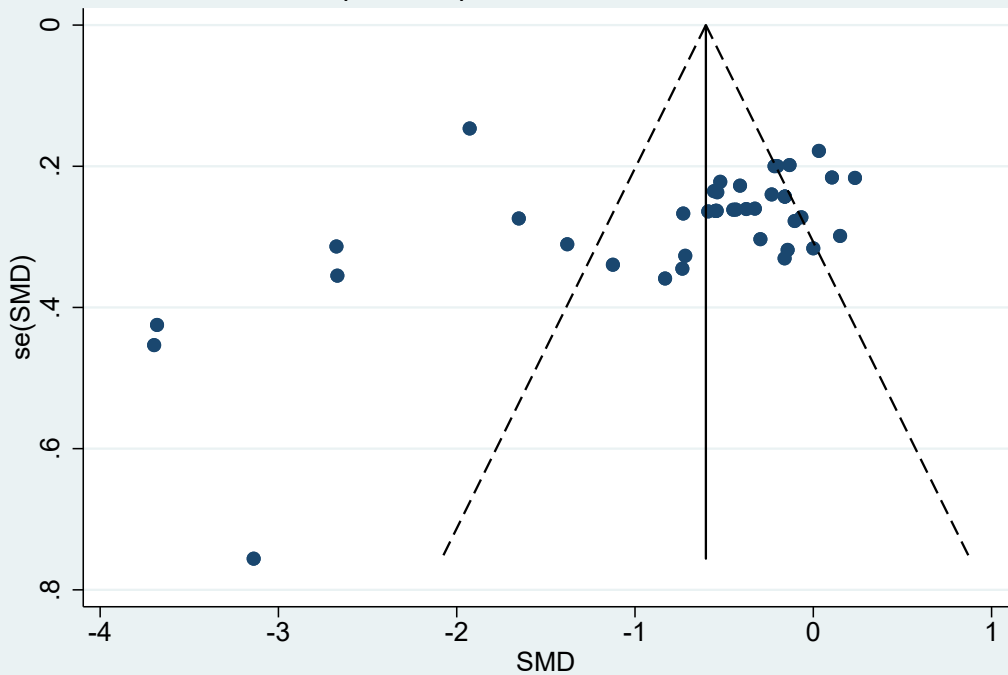

Supplement: s1 [file s1]

Funnel plot with pseudo 95% confidence limits

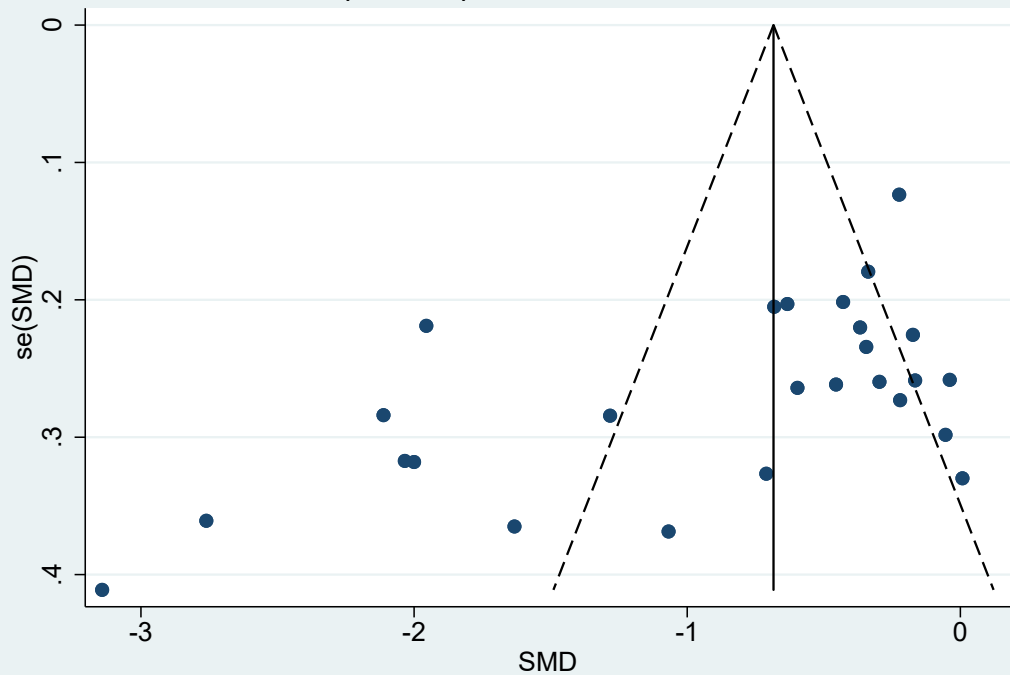

Supplement: s1 [file s1]
